# Supplementary material for: Resorufin-based responsive probes for fluorescence and colorimetric analysis
Source: Royal Society of Chemistry journal article supplement (doi:10.1039/d0tb01628d), 2020-10-14
Supplement: d0tb01628d1.pdf [file d0tb01628d1.pdf]

Electronic Supplementary Material (ESI) for

# Resorufin-based responsive probes for fluorescent and colorimetric analysis

Lu Tian,<sup>a</sup> Huan Feng,<sup>b</sup> Zhichao Dai,<sup>\*a</sup> Run Zhang<sup>\*b</sup>

<sup>a</sup>Key Laboratory of Functional Nanomaterials and Technology in Universities of Shandong, College of Chemistry and Chemical Engineering, Linyi University, Linyi 276005, P. R. China

<sup>b</sup> Australian Institute for Bioengineering and Nanotechnology, The University of Queensland, St. Lucia, Queensland 4072, Australia

\*Corresponding authors.

Tel./Fax: +86-539-7258629 (Z. D.); +61-7-33463806 (R. Z.)

E-mail: zc\_dai@126.com (Z. D.); r.zhang@uq.edu.au (R. Z.)

**Table S1.** Spectroscopic properties of resorufin and some common organic dyes.

| Dye          | Number | $\lambda_{\text{ex}}/\lambda_{\text{em}}$ (nm) | Molar absorptivity ( $\text{M}^{-1} \text{cm}^{-1}$ ) | $\phi$ (solvent)                | Aqueous solubility | Ref. |
|--------------|--------|------------------------------------------------|-------------------------------------------------------|---------------------------------|--------------------|------|
| Resorufin    | 1      | 572/585                                        | $5.6 \times 10^4$                                     | 0.74 (water)                    | hydrophilic        | 1    |
| BODIPY       | 2      | 499/509                                        | $5.4 \times 10^4$                                     | 0.70 (ethanol)                  | hydrophobic        | 2    |
|              | 3      | 510/520                                        | $3.4 \times 10^4$                                     | 0.40 (ethanol)                  |                    |      |
|              | 4      | 505/516                                        | $8.3 \times 10^4$                                     | 0.80 (ethanol)                  |                    |      |
| Coumarin     | 5      | 373/440                                        | -                                                     | 0.73 ( $\text{CH}_3\text{CN}$ ) | hydrophobic        | 3    |
|              | 6      | 412/529                                        | -                                                     | 0.81 ( $\text{CH}_3\text{CN}$ ) |                    | 3    |
|              | 7      | 326/392                                        | $1.2 \times 10^4$                                     | 0.21 (methanol)                 |                    | 4    |
| Fluorescein  | 8      | 491/519                                        | $8.79 \times 10^4$                                    | 0.93 (0.01 M NaOH)              | hydrophilic        | 5    |
|              | 9      | 494/520                                        | -                                                     | 0.93 (basic solution)           |                    | 6    |
| Rhodamine    | 10     | 555/580                                        | -                                                     | 0.31 (water)                    | hydrophilic        | 7    |
|              | 11     | 542(548)/568(552)                              | -                                                     | 0.28 (PBS buffer)               |                    | 8    |
| Cyanine      | 12     | 560/575                                        | $15 \times 10^4$                                      | 0.09 (ethanol)                  | hydrophilic        | 9    |
|              | 13     | 658/677                                        | $25 \times 10^4$                                      | 0.4 (ethanol)                   |                    |      |
| Changsha dye | 14     | 570/654                                        | $2.5 \times 10^4$                                     | 0.12 (methanol)                 | hydrophobic        | 10   |

|  |    |         |                   |                    |  |  |
|--|----|---------|-------------------|--------------------|--|--|
|  | 15 | 663/747 | $5.9 \times 10^4$ | 0.07<br>(methanol) |  |  |
|--|----|---------|-------------------|--------------------|--|--|

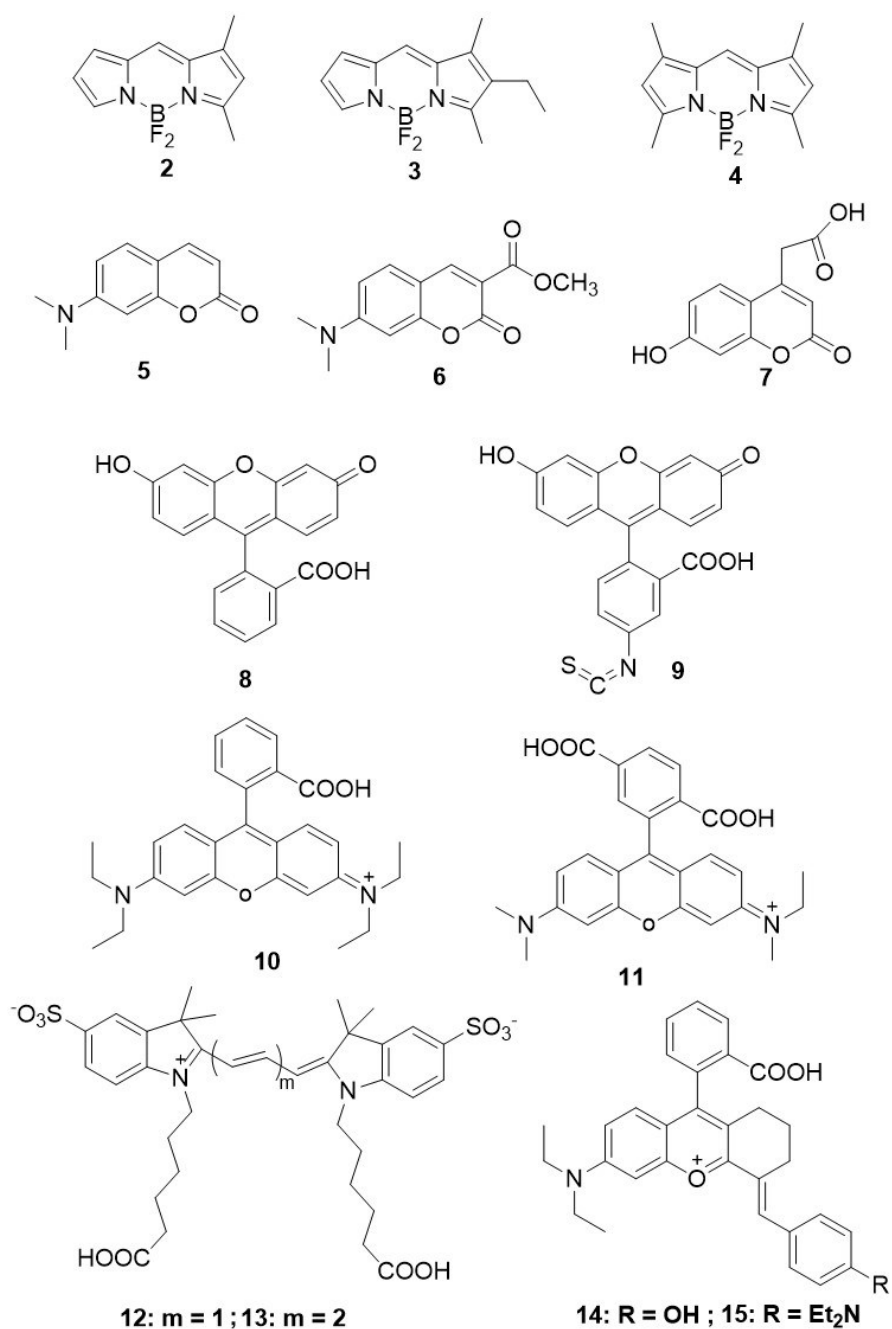

**Fig. S1.** Chemical structures of some organic fluorescence dyes.

## Reference

- Bueno, C.; Villegas, M.; Bertolotti, S.; Previtali, C.; Neumann, M.; Encinas, M. V., The excited-state interaction of resazurin and resorufin with amines in aqueous solutions. *Photophysics*

- and photochemical reaction. *Photochem. Photobiol.* **2002**, *76* (4), 385-390.
2. De Wael, E. V.; Pardoën, J.; Van Koeveringe, J.; Lugtenburg, J., Pyrromethene-BF<sub>2</sub> complexes (4, 4'-difluoro-4-bora-3a, 4a-diaza-s-indacenes). Synthesis and luminescence properties. *Recueil des Travaux Chimiques des Pays-Bas* **1977**, *96* (12), 306-309.
  3. Jung, Y.; Jung, J.; Huh, Y.; Kim, D., Benzo[g]coumarin-Based Fluorescent Probes for Bioimaging Applications. *J. Anal. Methods Chem.* **2018**, *2018*, 1-11.
  4. Gonçalves, M. S. T., Fluorescent labeling of biomolecules with organic probes. *Chem. rev.* **2009**, *109* (1), 190-212.
  5. Seybold, P. G.; Gouterman, M.; Callis, J., Calorimetric, photometric and lifetime determinations of fluorescence yields of fluorescein dyes. *Photochem. Photobiol.* **1969**, *9* (3), 229-242.
  6. Cheng, D.; Xu, Q.-H., Separation distance dependent fluorescence enhancement of fluorescein isothiocyanate by silver nanoparticles. *Chem. Commun.* **2007**, (3), 248-250.
  7. Magde, D.; Rojas, G. E.; Seybold, P. G., Solvent dependence of the fluorescence lifetimes of xanthene dyes. *Photochem. Photobiol.* **1999**, *70* (5), 737-744.
  8. Selvin, P. R.; Hearst, J. E., Luminescence energy transfer using a terbium chelate: improvements on fluorescence energy transfer. *Proc. Natl. Acad. Sci. U. S. A.* **1994**, *91* (21), 10024-10028.
  9. Mujumdar, R. B.; Ernst, L. A.; Mujumdar, S. R.; Lewis, C. J.; Waggoner, A. S., Cyanine dye labeling reagents: sulfoindocyanine succinimidyl esters. *Bioconjugate chem.* **1993**, *4* (2), 105-111.
  10. Yuan, L.; Lin, W.; Chen, H., Analogs of Changsha near-infrared dyes with large Stokes Shifts for bioimaging. *Biomaterials* **2013**, *34* (37), 9566-9571.
